# Supplementary material for: Transcriptome Dynamics of Rooting Zone and Leaves during In Vitro Adventitious Root Formation in Eucalyptus nitens
Source: MDPI journal article supplement (doi:10.3390/plants11233301), 2022-11-29
Supplement: s1 [file s1]

## Supplementary material

Article

# Transcriptome Dynamics of Rooting Zone and Leaves During *in vitro* Adventitious Root Formation in *Eucalyptus nitens*

Paula Ayala, Raúl Acevedo, Claudia Luna, Máximo Rivarola, Cintia Acuña, Susana Marcucci Poltri, Ana González and Pedro Sansberro

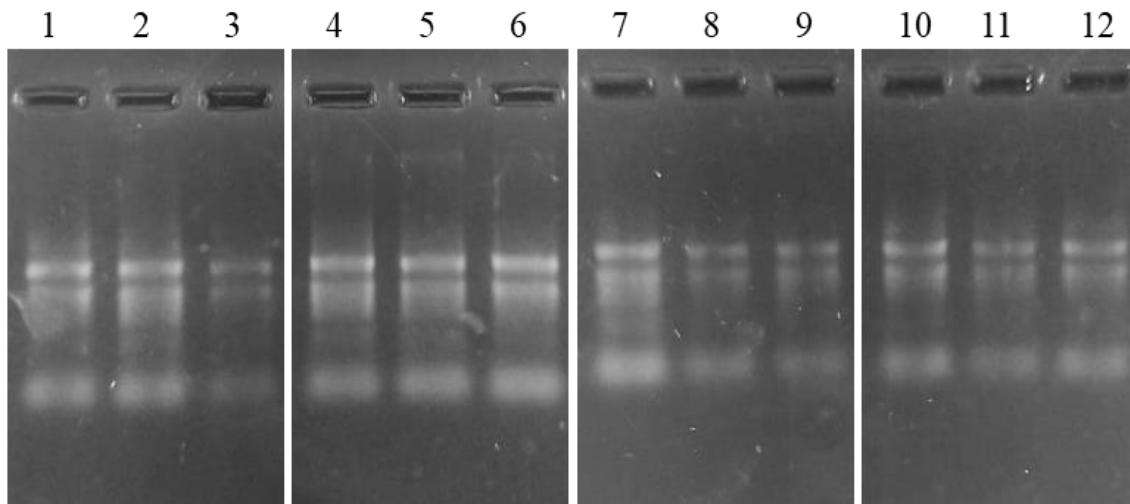

**Figure S1.** RNA integrity. Agarose gel electrophoresis of total RNA obtained from stems and leaves extracted before (S0) and after three/four (S3/4) days from IBA treatment. Three biological replicates per sample were used. Stem bases: S0, lanes 1, 2 and 3; S3/4, lanes 4, 5 and 6. Leaves: S0, lanes 7, 8 and 9; S3/4, lanes 10, 11 and 12).

RNA integrity was analyzed by horizontal 2% agarose gel electrophoresis and stained with GelGreen<sup>®</sup>. Total RNA concentrations varied between 436.4 and 1,301.1 ng/μL. The purity ratio A260/280 varied between 1.89 and 2.05, while A260/230 ranged between 1.86 and 2.08. No RNA degradation was observed.

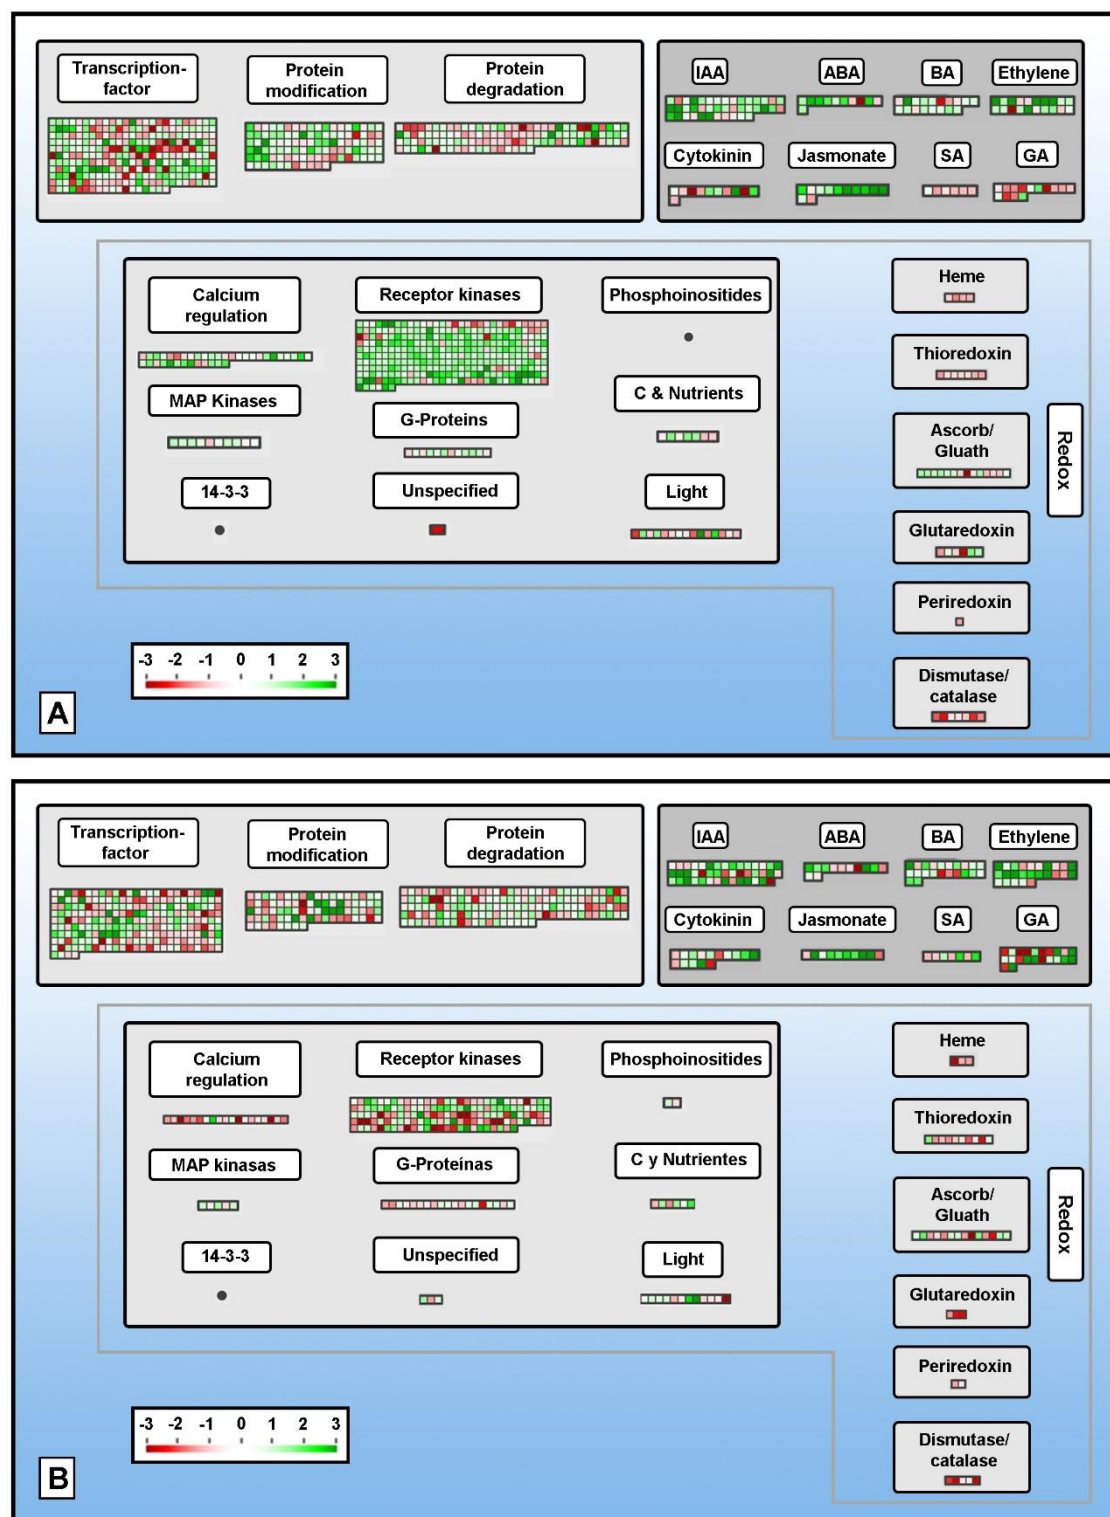

**Figure S2.** MapMan regulation overview of *E. nitens* leaves (**A**) and stem bases (**B**) gene expression during the early step of root formation. Each square corresponds to a gene. Red and green indicate lower and higher expression than the control, respectively. The scale bar is shown in log2. Sequences with a fold change (FC)  $\geq 2$  in its expression between treatments and FDR  $< 0.05$  were assigned as a differentially expressed transcript.

**Table S1.** Gene expression fold changes on day three/four after the IBA treatment, determined by RT-qPCR and RNA-seq analysis.

| <b>Gene Name</b>                                         | <b>qPCR</b> | <b>ARN-seq</b> |
|----------------------------------------------------------|-------------|----------------|
| <i>Endoglucanase 1 (Endo1)</i>                           | 6,25        | 6,29           |
| <i>Citokinin dehydrogenase (CitokDes3)</i>               | 4,75        | 5,36           |
| <i>Ethylene-responsive transcription tactor (ERF003)</i> | 2,46        | 4,46           |
| <i>1-aminocyclopropane-1-carboxylate oxidase (ACO)</i>   | -2,83       | -1,81          |
| <i>Fructose-bisphosphate aldolase (FBA)</i>              | -4,64       | -2,02          |
| <i>Translation elongation factor 2 (EF 2)</i>            | 1           | 1              |
| <i>Isoprene synthase, chloroplastic-like (ISC-like)</i>  | -6,64       | -5,18          |
| <i>Gretchen hagen 3 (GH3-1)</i>                          | 3,54        | 8,42           |
| <i>Cellulose synthase A catalytic 8 (CSACat8)</i>        | -4,05       | -3,04          |
| <i>Auxin response factors (ARF6)</i>                     | 0,23        | 1,03           |
| <i>Scarecrow (SCR)</i>                                   | 1,5         | 1,93           |

**Table S2.** Differentially expressed transcripts (DETs).

| Sigla              | Transcript     | Annotation                                                                                                   | Function                     | Log <sub>2</sub> FC |
|--------------------|----------------|--------------------------------------------------------------------------------------------------------------|------------------------------|---------------------|
| Auxins metabolisms |                |                                                                                                              |                              |                     |
| T1                 | tr3710_c79_g1  | Acyl-CoA dehydrogenase/oxidase (IBR3)                                                                        | IBA to IAA conversion        | ns L                |
| T2                 | tr1960_c212_g1 | Enoyl-CoA hydratase (IBR10)                                                                                  | IBA to IAA conversion        | ↑ 1.0 L             |
| T3                 | tr905_c81_g1   | Enoyl-CoA hydratase (IBR10)                                                                                  | IBA to IAA conversion        | ↑ 1.1 L             |
| T4                 | tr1960_c199_g2 | Enoyl-CoA hydratase (IBR10)                                                                                  | IBA to IAA conversion        | ↑ 0.7 L             |
| T5                 | tr5933_c23_g1  | Enoyl-CoA hydratase 2 (ECH2)                                                                                 | IBA to IAA conversion        | ns L                |
| T6                 | tr496_c723_g1  | GRETCHEN HAGEN 3<br>IAA-amida synthase GH3.1                                                                 | IAA - amino acid conjugation | ↑ 3.8 L<br>↑ 2.9 S  |
| T7                 | tr1863_c28_g12 | GRETCHEN HAGEN 3<br>IAA-amida synthase GH3.1                                                                 | IAA - amino acid conjugation | ↑ 7.2 L<br>↑ 8.4 S  |
| T8                 | tr1863_c28_g8  | GRETCHEN HAGEN 3<br>IAA-amida synthase GH3.1                                                                 | IAA - amino acid conjugation | ↑ 9.6 L<br>↑ 10.3 S |
| T9                 | tr4738_c576_g1 | GRETCHEN HAGEN 3<br>IAA-amida synthase GH3.5                                                                 | IAA - amino acid conjugation | ↑ 1.1 L<br>↑ 1.0 S  |
| T10                | tr6569_c202_g1 | GRETCHEN HAGEN 3<br>IAA-amida synthase GH3.5                                                                 | IAA - amino acid conjugation | ↑ 1.1 L<br>↑ 2.8 S  |
| T11                | tr1921_c236_g3 | Uridine 5'-diphosphate-glucose:indol-3-ylacetyl)-beta-D-glucosyl transferase<br>UDP-glucosyltransferase      | IAA - sugar conjugation      | ↑ 0.8 L             |
| T12                | tr1921_c245_g1 | Uridine 5'-diphosphate-glucose:indol-3-ylacetyl)-beta-D-glucosyl transferase<br>UDP-glucosyltransferase      | IAA - sugar conjugation      | ↑ 0.7 L             |
| T13                | tr268_c28_g1   | Uridine 5'-diphosphate-glucose:indol-3-ylacetyl)-beta-D-glucosyl transferase<br>UDP-glucosyltransferase 75B1 | IAA - sugar conjugation      | ↑ 0.8 L<br>↑ 1.1 S  |
| T14                | tr1939_c3_g1   | Uridine 5'-diphosphate-glucose:indol-3-ylacetyl)-beta-D-glucosyl transferase<br>UDP-glucosyltransferase      | IAA - sugar conjugation      | ↑ 0.7 L             |
| T15                | tr1921_c236_g9 | Uridine 5'-diphosphate-glucose:indol-3-acetyl)-beta-D-glucosyl transferase<br>UDP-glucosyltransferase        | IAA - sugar conjugation      | ↑ 1.4 L             |
| T16                | tr268_c33_g3   | Uridine 5'-diphosphate-glucose:indol-3-acetyl)-beta-D-glucosyl transferase<br>UDP-glucosyltransferase 75B2   | IAA - sugar conjugation      | ↑ 1.5 L<br>↑ 1.7 S  |
| T17                | tr3678_c14_g2  | Uridine 5'-diphosphate-glucose:indol-3-acetyl)-beta-D-glucosyl transferase<br>UDP-glucosyltransferase 74F1   | IAA - sugar conjugation      | ↑ 2.3 S             |
| T18                | tr5846_c882_g1 | IAR3/ILL2 hydrolase                                                                                          | Amide-bond cleavage          | ↑ 0.8 S             |
| T19                | tr4275_c68_g2  | IAR3/ILL2 hydrolase                                                                                          | Amide-bond cleavage          | ↑ 0.9 S             |
| T20                | tr4002_c17_g2  | IAR3/ILL2 hydrolase                                                                                          | Amide-bond cleavage          | ↑ 0.9 S             |
| T21                | tr5825_c150_g1 | IAA carboxyl methyltransferase 1 (IAMT1).                                                                    | IAA methylation              | ↑ 4.1 L<br>↑ 6.4 S  |
| T22                | tr2658_c159_g1 | LIKE AUXIN RESISTANT2 (LAX2)                                                                                 | IAA influx carrier           | ↑ 1.6 L             |
| T23                | tr7297_c420_g1 | PIN1                                                                                                         | IAA efflux carrier           | ↑ 1.8 L<br>↑ 1.7 S  |
| T24                | tr3578_c13_g1  | PIN1                                                                                                         | IAA efflux carrier           | ↑ 1.1 L             |
| T25                | tr5015_c923_g1 | PIN7                                                                                                         | IAA efflux carrier           | ↑ 1.2 L<br>↑ 1.4 S  |
| T26                | tr2528_c174_g1 | PIN3                                                                                                         | IAA efflux carrier           | ↑ 1.0 S             |
| T27                | tr5878_c121_g1 | PIN6                                                                                                         | IAA efflux carrier           | ↑ 1.9 S             |
| T28                | tr2658_c159_g1 | LIKE AUXIN RESISTANT3 (LAX3)                                                                                 | IAA/IBA influx carrier       | ↑ 2.8 S             |
| T29                | tr4959_c346_g1 | ABCG36/ABCG37                                                                                                | IBA efflux carrier           | ↑ 3.1 L             |
| T30                | tr908_c134_g1  | ABCG36/ABCG37                                                                                                | IBA efflux carrier           | ↑ 3.1 L             |
| T31                | tr7363_c12_g1  | ABCG36/ABCG37                                                                                                | IBA efflux carrier           | ↑ 3.1 L             |

|                                     |                  |                                         |                                     |                    |
|-------------------------------------|------------------|-----------------------------------------|-------------------------------------|--------------------|
| T32                                 | tr5920_c209_g1   | PXA1/ABCD1                              | IBA efflux carrier                  | ↑ 2.2 H            |
| Hormonal interactions and signaling |                  |                                         |                                     |                    |
| T33                                 | tr7325_c340_g1   | Transport Inhibitor Response 1 (TIR1)   | Auxin receptor                      | ↓ -1.4 L           |
| T34                                 | tr5854_c681_g1   | IAA6 transcription factor               | Aux/IAA protein family gene         | ↑ 2.1 L            |
| T35                                 | tr2018_c21_g1    | IAA13 transcription factor              | Aux/IAA protein family gene         | ↑ 1.3 L            |
| T36                                 | tr3553_c114_g1   | IAA34 transcription factor              | Aux/IAA protein family gene         | ↑ 2.0 L            |
| T37                                 | tr3909_c8_g1     | IAA33 transcription factor              | Aux/IAA protein family gene         | ↓ -4.4 L           |
| T38                                 | tr2100_c21_g1    | AHL20 transcription factor              | Aux/IAA protein family gene         | ↓ -2.1 L           |
| T39                                 | tr4032_c79_g1    | IAA14 transcription factor              | Aux/IAA protein family gene         | ↑ 2.9 S            |
| T40                                 | tr937_c94_g1     | IAA7 transcription factor               | Aux/IAA protein family gene         | ↑ 2.4 L<br>↑ 1.0 S |
| T41                                 | tr1963_c18_g1    | IAA7 transcription factor               | Aux/IAA protein family gene         | ↑ 1.3 S            |
| T42                                 | Tr1925_c27_g1    | IAA8 transcription factor               | Aux/IAA protein family gene         | ↑ 1.0 L<br>↑ 1.6 S |
| T43                                 | tr5955_c127_g2   | IAA8 transcription factor               | Aux/IAA protein family gene         | ↑ 0.6 L            |
| T44                                 | 3866_c90_g2      | IAA10 transcription factor              | Aux/IAA protein family gene         | ↑ 2.3 L<br>↑ 3.1 S |
| T45                                 | tr1260_c1_g1     | IAA10 transcription factor              | Aux/IAA protein family gene         | ↑ 2.4 L<br>↑ 4.7 S |
| T46                                 | tr1960_c281_g1   | ARG4 transcription factor               | Aux/IAA protein family gene         | ↑ 1.5 L<br>↑ 1.7 S |
| T47                                 | tr1963_c17_g10   | ARG4 transcription factor               | Aux/IAA protein family gene         | ↑ 1.4 L<br>↑ 1.6 S |
| T48                                 | tr1963_c17_g8    | ARG4 transcription factor               | Aux/IAA protein family gene         | ↑ 1.3 L<br>↑ 1.6 S |
| T49                                 | tr4785_c211_g1.4 | Auxin Response Factor ARF6              | Mediate auxin responses             | ↑ 1.2 S            |
| T50                                 | tr5939_c74_g2    | Auxin Response Factor ARF6              | Mediate auxin responses             | ↑ 0.9 S            |
| T51                                 | tr5015_c534_g1   | Auxin Response Factor ARF8              | Mediate auxin responses             | ↑ 1.2 S            |
| T52                                 | tr5921_c82_g1    | Auxin Response Factor ARF17             | Mediate auxin responses             | ns S               |
| T53                                 | tr4280_c47_g1    | Auxin Response Factor ARF19             | Mediate auxin responses             | ↑ 1.1 L<br>↑ 1.0 S |
| T54                                 | tr5939_c74_g2    | Auxin Response Factor ARF19             | Mediate auxin responses             | ↑ 0.9 S            |
| T55                                 | Tr1963_c17_g6    | SHY2/IAA3 transcription factor          | Aux/IAA protein family gene         | ↑ 1.4 L<br>↑ 2.1 S |
| T56                                 | tr7325_c339_g1   | SHY2/IAA3 transcription factor          | Aux/IAA protein family gene         | ↑ 1.9 L<br>↑ 5.5 S |
| T57                                 | tr496_c1164_g2   | Small Auxin Up RNAs. SAUR-like (SAUR68) | Auxin responsive genes. SAUR family | ↑ 1.7 L<br>↑ 3.8 S |
| T58                                 | tr496_c909_g3    | Small Auxin Up RNAs. SAUR-like          | Auxin responsive genes. SAUR family | ↑ 1.0 L<br>↑ 1.4 S |
| T59                                 | tr5943_c263_g2   | Small Auxin Up RNAs. SAUR-like          | Auxin responsive genes. SAUR family | ↑ 1.7 L            |
| T60                                 | tr496_c1254_g9   | Small Auxin Up RNAs. SAUR-like          | Auxin responsive genes. SAUR family | ↑ 3.0 S            |
| T61                                 | tr496_c1254_g7   | Small Auxin Up RNAs. SAUR-like          | Auxin responsive genes. SAUR family | ↑ 3.1 S            |
| T62                                 | tr496_c1254_g10  | Small Auxin Up RNAs. SAUR-like          | Auxin responsive genes. SAUR family | ↑ 2.1 S            |
| T63                                 | tr496_c750_g1    | Small Auxin Up RNAs. SAUR-like          | Auxin responsive genes. SAUR family | ↑ 2.1 S            |
| T64                                 | tr5293_c0_g1     | Small Auxin Up RNAs. SAUR-like          | Auxin responsive genes. SAUR family | ↑ 6.3 S            |
| T65                                 | tr496_c558_g2    | Small Auxin Up RNAs. SAUR-like          | Auxin responsive genes. SAUR family | ↑ 2.2 S            |
| T66                                 | tr2672_c0_g1     | Small Auxin Up RNAs. SAUR-like          | Auxin responsive genes. SAUR family | ↑ 1.2 S            |
| T67                                 | tr5839_c72_g1    | Cyclin D-type (CCD3-1)                  | Cell cycle control                  | ↑ 1.1 S            |

|     |                 |                                                            |                                           |                    |
|-----|-----------------|------------------------------------------------------------|-------------------------------------------|--------------------|
| T68 | tr530_c92_g1    | Cyclin D-type (CCD3-1)                                     | Cell cycle control                        | ↑ 1.0 S            |
| T69 | tr5934_c173_g1  | Cyclin-dependent kinase 1 (CKB1-1)                         | Cell cycle control                        | ↑ 1.6 S            |
| T70 | tr4991_c487_g1  | Cyclin-dependent kinase 1 (CKB1-1)                         | Cell cycle control                        | ↑ 1.4 S            |
| T71 | tr931_c33_g1    | Cyclin-dependent kinase 1 (CKS1)                           | Cell cycle control                        | ns S               |
| T72 | tr2103_c159_g1  | Cyclin-dependent kinase 1 (CDKA1)                          | Cell cycle control                        | ↑ 0.6 S            |
| T73 | tr5864_c693_g1  | SCARECROW-like 5 (SCL5)                                    | Transcriptional regulator.<br>GRAS family | ↑ 1.3 S            |
| T74 | tr6540_c351_g1  | SCARECROW-like 13 (SCL13)                                  | Transcriptional regulator.<br>GRAS family | ↓ -0,7 L           |
| T75 | tr7260_c339_g1  | SCARECROW-like 13 (SCL13)                                  | Transcriptional regulator.<br>GRAS family | ↓ -0,9 S           |
| T76 | tr3686_c605_g1  | SCARECROW-like 14 (SCL14)                                  | Regulador transcripcional<br>familia GRAS | ↑ 1.2 L<br>↑ 1.9 S |
| T77 | tr972_c169_g3   | SCARECROW-like 14 (SCL14)                                  | Transcriptional regulator.<br>GRAS family | ↑ 0.9 L            |
| T78 | tr3686_c713_g1  | SCARECROW-like 14 (SCL14)                                  | Transcriptional regulator.<br>GRAS family | ↑ 0.6 L            |
| T79 | tr3686_c530_g1  | SCARECROW-like 14 (SCL14)                                  | Transcriptional regulator.<br>GRAS family | ↑ 0.9 L<br>↑ 1.1 S |
| T80 | tr3686_c710_g1  | SCARECROW-like 14 (SCL14)                                  | Transcriptional regulator.<br>GRAS family | ↑ 1.3 L            |
| T81 | tr3686_c814_g5  | SCARECROW-like 14 (SCL14)                                  | Transcriptional regulator.<br>GRAS family | ↑ 0.8 S            |
| T82 | tr5916_c1149_g3 | SCARECROW-like 21 (SCL21)                                  | Transcriptional regulator.<br>GRAS family | ↑ 1.3 L            |
| T83 | tr4988_c126_g1  | SCARECROW-like 21 (SCL21)                                  | Transcriptional regulator.<br>GRAS family | ↑ 2.0 S            |
| T84 | tr4752_c258_g4  | 1-aminocyclopropane-1-carboxylate<br>synthase 1 (ACC1)     | Biosíntesis de etileno                    | ↑ 1.1 L<br>↑ 2.5 S |
| T85 | tr43_c3_g1      | 1-aminocyclopropane-1-carboxylate<br>synthase 1 (ACC1)     | Ethylene biosynthesis                     | ↑ 1.2 L<br>↑ 2.7 S |
| T86 | tr3461_c0_g2    | 1-aminocyclopropane-1-carboxylate<br>synthase 1 (ACC1)     | Ethylene biosynthesis                     | ↑ 4.5 S            |
| T87 | tr6569_c89_g1   | 1-aminocyclopropane-1-carboxylate<br>synthase 2 (ACC2)     | Ethylene biosynthesis                     | ↑ 3.1 L<br>↑ 4.4 S |
| T88 | tr2886_c3_g2    | 1-aminocyclopropane-1-carboxylate<br>synthase 2 (ACC2)     | Ethylene biosynthesis                     | ↑ 2.0 S            |
| T89 | tr4752_c258_g3  | 1-aminocyclopropane-1-carboxylate<br>synthase 2 (ACC2)     | Ethylene biosynthesis                     | ↑ 2.1 S            |
| T90 | tr5955_c244_g1  | 1-aminocyclopropane-1-carboxylate<br>synthase 4 (ACC4)     | Ethylene biosynthesis                     | ↑ 6.2 L<br>↑ 3.4 S |
| T91 | tr1877_c23_g1   | 1-aminocyclopropane-1-carboxylate<br>synthase 4 (ACC4)     | Ethylene biosynthesis                     | ↑ 4.6 L<br>↑ 3.2 S |
| T92 | tr5020_c252_g1  | 1-aminocyclopropane-1-carboxylate<br>oxidase (ACC oxidase) | Ethylene biosynthesis                     | ↑ 1.4 L<br>↑ 1.9 S |
| T93 | tr3855_c80_g1   | 1-aminocyclopropane-1-carboxylate<br>oxidase (ACC oxidase) | Ethylene biosynthesis                     | ↑ 6.3 L<br>↑ 5.7 S |
| T94 | Tr1921_c200_g1  | 1-aminocyclopropane-1-carboxylate<br>oxidase (ACC oxidase) | Ethylene biosynthesis                     | ↑ 9.8 L<br>↑ 6.1 S |
| T95 | tr4834_c160_g1  | 1-aminocyclopropane-1-carboxylate<br>oxidase (ACC oxidase) | Ethylene biosynthesis                     | ↑ 1.2 L            |
| T96 | Tr5534_c0_g1    | 1-aminocyclopropane-1-carboxylate<br>oxidase (ACC oxidase) | Ethylene biosynthesis                     | ↑ 1.1 L            |
| T97 | tr7260_c403_g2  | 1-aminocyclopropane-1-carboxylate<br>oxidase (ACC oxidase) | Ethylene biosynthesis                     | ↑ 1.2 L            |
| T98 | tr4269_c56_g1   | 1-aminocyclopropane-1-carboxylate<br>oxidase (ACC oxidase) | Ethylene biosynthesis                     | ↓ -3.6 L           |

|      |                 |                                                         |                                             |                    |
|------|-----------------|---------------------------------------------------------|---------------------------------------------|--------------------|
| T99  | tr7299_c221_g2  | 1-aminocyclopropane-1-carboxylate oxidase (ACC oxidase) | Ethylene biosynthesis                       | ↑ 0.9 S            |
| T100 | tr4991_c501_g1  | 1-aminocyclopropane-1-carboxylate oxidase (ACC oxidase) | Ethylene biosynthesis                       | ↓ -1.5 S           |
| T101 | tr7325_c185_g1  | Ethylene receptor subfamily 1 (ERS1)                    | Ethylene receptor                           | ↑ 0.8 S            |
| T102 | tr2039_c114_g1  | Ethylene receptor, subfamily 2 (ERS2)                   | Ethylene receptor                           | ↓ -0.7 L           |
| T103 | tr2100_c61_g1   | Ethylene response 2 (ETR2)                              | Ethylene receptor                           | ↑ 1.2 S            |
| T104 | tr566_c73_g1    | Ethylene Response Factor. ABA REPRESSOR1 (ABR1)         | Transcriptional regulator. AP2/EREBP family | ↑ 1.3 L            |
| T105 | tr3742_c81_g1   | Ethylene Response Factor. (ERF)                         | Transcriptional regulator. AP2/EREBP family | ↑ 0.7 L            |
| T106 | tr5875_c146_g1  | Ethylene Response Factor. (ERF)                         | Transcriptional regulator. AP2/EREBP family | ↑ 3.0 L<br>↑ 4.5 S |
| T107 | tr566_c73_g1    | Ethylene Response Factor. (ERF)                         | Transcriptional regulator. AP2/EREBP family | ↑ 0.9 S            |
| T108 | tr2674_c89_g1   | Ethylene Response Factor 1 (ERF1)                       | Transcriptional regulator. AP2/EREBP family | ↑ 1.3 S            |
| T109 | tr3743_c922_g1  | Ethylene Response Factor 1 (ERF1)                       | Transcriptional regulator. AP2/EREBP family | ↑ 1.2 S            |
| T110 | tr3961_c11_g1   | Ethylene Response Factor 1 (ERF1)                       | Transcriptional regulator. AP2/EREBP family | ↓ -2.8 S           |
| T111 | tr7299_c142_g1  | Ethylene Response Factor 1 (ERF1)                       | Transcriptional regulator. AP2/EREBP family | ↑ 1.4 L            |
| T112 | tr6442_c0_g1    | Ethylene Response Factor 1 (ERF1)                       | Transcriptional regulator. AP2/EREBP family | ↑ 1.6 L            |
| T113 | tr3743_c922_g1  | Ethylene Response Factor 4 (ERF4)                       | Transcriptional regulator. AP2/EREBP family | ↑ 1.1 L            |
| T114 | tr7297_c516_g1  | Ethylene Response Factor 110 (ERF110)                   | Transcriptional regulator. AP2/EREBP family | ↑ 1.6 L<br>↑ 3.5 S |
| T115 | tr5854_c451_g1  | Ethylene Response Factor 110 (ERF110)                   | Transcriptional regulator. AP2/EREBP family | ↑ 1.2 L            |
| T116 | tr7316_c200_g1  | Ethylene Response Factor 110 (ERF110)                   | Transcriptional regulator. AP2/EREBP family | ↑ 1.9 S            |
| T117 | tr3743_c922_g1  | Ethylene Response Factor 115 (ERF115)                   | Transcriptional regulator. AP2/EREBP family | ↑ 1.1 L<br>↑ 1.2 S |
| T118 | tr1877_c153_g9  | AINTEGUMENTA (ANT)                                      | Transcriptional regulator. AP2/EREBP family | ↑ 1.6 L            |
| T119 | tr531_c93_g1    | AINTEGUMENTA-like 6 (AIL6)                              | Transcriptional regulator. AP2/EREBP family | ↑ 3.0 L<br>↑ 3.4 S |
| T120 | tr3746_c101_g1  | Factor de transcripción RAV (ABI3/VP1 2)                | Transcriptional regulator. AP2/EREBP family | ↑ 0.7 L            |
| T121 | tr4885_c0_g1    | 12-oxophytodienoate reductase 2 (12-Oxo-PDA-reductase)  | Jasmonic acid biosynthesis                  | ↑ 2.5 L<br>↑ 1.9 S |
| T122 | tr4270_c63_g2   | 12-oxophytodienoate reductase 2 (12-Oxo-PDA-reductase)  | Jasmonic acid biosynthesis                  | ↑ 4.0 L            |
| T123 | tr4270_c63_g1   | 12-oxophytodienoate reductase 2 (12-Oxo-PDA-reductase)  | Jasmonic acid biosynthesis                  | ↑ 2.8 L<br>↑ 2.5 S |
| T124 | tr4270_c63_g8   | 12-oxophytodienoate reductase 2 (12-Oxo-PDA-reductase)  | Biosíntesis de ácido jasmónico              | ↑ 2.7 L<br>↑ 3.7 S |
| T125 | tr4270_c63_g13  | 12-oxophytodienoate reductase 2 (12-Oxo-PDA-reductase)  | Jasmonic acid biosynthesis                  | ↑ 2.6 L<br>↑ 4.4 S |
| T126 | tr4270_c63_g10  | 12-oxophytodienoate reductase 2 (12-Oxo-PDA-reductase)  | Jasmonic acid biosynthesis                  | ↑ 8.5 L<br>↑ 6.3 S |
| T127 | tr4062_c0_g2    | 12-oxophytodienoate reductase 2 (12-Oxo-PDA-reductase)  | Jasmonic acid biosynthesis                  | ↑ 2.2 S            |
| T128 | tr3678_c490_g1  | Type A Regulator Response 3 (ARR3)                      | Cytokinin signalling                        | ↓ -2.6 S           |
| T129 | tr3743_c1776_g1 | Type A Regulator Response 3 (ARR3)                      | Cytokinin signalling                        | ↓ -1.1 S           |
| T130 | tr5015_c629_g1  | Type A Regulator Response 3 (ARR3)                      | Cytokinin signalling                        | ↓ -1.9 L           |
| T131 | tr7332_c101_g3  | Type A Regulator Response 9 (ARR9)                      | Cytokinin signalling                        | ↓ -1.3 T           |

|      |                 |                                                                          |                                            |                      |
|------|-----------------|--------------------------------------------------------------------------|--------------------------------------------|----------------------|
| T132 | tr 3873_c119_g2 | KNOTTED1-like homeobox gene 3 (KNAT3)                                    | Regulador transcripcional familia Homeobox | ↓ -0.9 S             |
| T133 | tr4751_c25_g1   | KNOTTED1-like homeobox gene 7 (KNAT7)                                    | Transcriptional regulator. Homeobox family | ↓ -1.3 S             |
| T134 | tr3574_c196_g1  | isopentenyltransferase 5 (IPT5)                                          | Cytokinin biosynthesis                     | ↓ -3.6 L<br>↓ -2.0 S |
| T135 | tr7325_c211_g1  | isopentenyltransferase 5 (IPT5)                                          | Cytokinin biosynthesis                     | ↓ -1.5 L             |
| T136 | tr5133_c4_g1    | UDP-glucosyl transferase 76C1                                            | Cytokinin conjugation                      | ↑ 0.7 S<br>↑ 0.8 S   |
| T137 | tr979_c108_g1   | UDP-glucosyl transferase 76C2                                            | Cytokinin conjugation                      | ↑ 1.8 S              |
| T138 | tr4966_c42_g1   | UDP-Glycosyltransferase superfamily protein                              | Cytokinin conjugation                      | ↑ 1.5 S              |
| T139 | tr3691_c13_g1   | UDP-glucosyl transferase 85A3                                            | Cytokinin conjugation                      | ↑ 0.8 S              |
| T140 | tr2527_c912_g1  | UDP-Glycosyltransferase superfamily protein                              | Cytokinin conjugation                      | ↑ 1.3 S              |
| T141 | tr979_c108_g8   | UDP-glucosyl transferase 76E1                                            | Cytokinin conjugation                      | ↑ 1.4 L<br>↑ 1.4 S   |
| T142 | tr2527_c914_g1  | Cytokinin oxidase/dehydrogenase 1 (CKX1)                                 | Cytokinin catabolism                       | ↑ 2.4 S              |
| T143 | tr4029_c449_g1  | Cytokinin oxidase/dehydrogenase 4 (CKX4)                                 | Cytokinin catabolism                       | ↑ 5.0 S<br>↑ 5.4 S   |
| T144 | tr4738_c764_g1  | ent-kaurenoic acid hydroxylase (KAO2)                                    | Gibberellin biosynthesis                   | ↓ -2.9 S             |
| T145 | tr3921_c82_g9   | 2-oxoglutarate (2OG) and Fe (II)-dependent oxygenase superfamily protein | Gibberellin biosynthesis                   | ↓ -5.6 S             |
| T146 | tr4278_c39_g28  | 2-oxoglutarate (2OG) and Fe (II)-dependent oxygenase superfamily protein | Gibberellin biosynthesis                   | ↓ -3.0 S             |
| T147 | tr937_c208_g2   | 2-oxoglutarate (2OG) and Fe (II)-dependent oxygenase superfamily protein | Gibberellin biosynthesis                   | ↓ -2.7 L             |
| T148 | tr937_c235_g1   | GA3 oxidase                                                              | Gibberellin biosynthesis                   | ↓ -2.3 L             |
| T149 | tr5854_c399_g1  | GA3 oxidase                                                              | Gibberellin biosynthesis                   | ↓ -1.3 L             |
| T150 | tr7292_c143_g1  | GA20 oxidase                                                             | Gibberellin biosynthesis                   | ↓ -1.6 L             |
| T151 | tr4738_c658_g1  | GA20 oxidase                                                             | Gibberellin biosynthesis                   | ↓ -2.2 S             |
| T152 | tr5846_c486_g1  | GA2 oxidase                                                              | Gibberellin catabolism                     | ↑ 0.8 L<br>↑ 3.4 S   |
| T153 | tr5831_c10_g1   | GAs-regulated GASA/GAST/Snakin family protein (GAST1-homolog1)           | Gibberellin-regulated family protein       | ↑ 6.9 S              |
| T154 | tr5884_c71_g5   | GAs-regulated GASA/GAST/Snakin family protein (GAST1-homolog3)           | Gibberellin-regulated family protein       | ↓ -1.4 L             |
| T155 | tr3743_c2135_g1 | GAs-regulated GASA/GAST/Snakin family protein (GAST1-homolog4)           | Gibberellin-regulated family protein       | ↓ -2.2 L<br>↑ 2.7 S  |
| T156 | tr7318_c93_g1   | GAs-regulated GASA/GAST/Snakin family protein (GAST1-homolog4)           | Gibberellin-regulated family protein       | ↓ -1.8 L<br>↑ 5.9 S  |
| T157 | tr5846_c761_g1  | GAs-regulated GASA/GAST/Snakin family protein (GAST1-homolog5)           | Gibberellin-regulated family protein       | ↑ 1.2 S              |
| T158 | tr7316_c167_g1  | HVA22 homologue D                                                        | Dehydration response                       | ↑ 2.5 L              |
| T159 | tr3743_c1615_g1 | HVA22 homologue C                                                        | Dehydration response                       | ↑ 1.3 L              |
| T160 | tr3996_c70_g1   | Alcohol deshidrogenasa (ABA2)                                            | ABA biosynthesis                           | ↓ -3.0 L<br>↓ 1.6 S  |
| T161 | tr4991_c235_g2  | UDP-glucosyl transferase 71B5 (UGT71B5)                                  | ABA conjugation                            | ↑ 2.0 L              |
| T162 | tr4991_c629_g1  | UDP-glucosyl transferase 71B6 (UGT71B6)                                  | ABA conjugation                            | ↑ 1.3 L              |
| T163 | tr4991_c638_g1  | UDP-glucosyl transferase 71B6 (UGT71B6)                                  | ABA conjugation                            | ↑ 2.8 L<br>↑ 1.7 S   |
| T164 | tr4991_c638_g2  | UDP-glucosyl transferase 71B6 (UGT71B6)                                  | ABA conjugation                            | ↑ 2.7 L<br>↑ 2.0 S   |

|      |                |                                         |                                |         |
|------|----------------|-----------------------------------------|--------------------------------|---------|
| T165 | tr4991_c577_g2 | UDP-glucosyl transferase 71B6 (UGT71B6) | ABA conjugation                | ↑ 1.1 L |
| T166 | tr4991_c526_g1 | UDP-glucosyl transferase 71B6 (UGT71B6) | ABA conjugation                | ↑ 2.2 L |
| T167 | tr3964_c199_g1 | AURORA1 (AUR1)                          | Microtubule-associated protein | ↑ 1.9 L |
| T168 | tr5020_c553_g1 | MAP65-3                                 | Microtubule-associated protein | ↑ 1.6 L |

References:

**L**, leaves; **S**, stem bases (rooting zone)

**Table S3.** Primers designed for qPCR validation of RNA-seq data.

| Gene name                                                       | Primers                                  | Sequences (5' → 3')                                   | Amplicon size (pb) |
|-----------------------------------------------------------------|------------------------------------------|-------------------------------------------------------|--------------------|
| <b><i>Endoglucanase 1 (Endo1)</i></b>                           | <i>Endo1_F</i><br><i>Endo1_R</i>         | GGGGACAACCCAGCCAAGAC<br>TTGCACGAGATGCGGCTAGG          | 122                |
| <b><i>Cytokinin dehydrogenase (CitokDes3)</i></b>               | <i>CitokDes3_F</i><br><i>CitokDes3_R</i> | CCGTCAGAGAAAAGCCCGGT<br>CCCAAACCGCAGCAACGAAC          | 106                |
| <b><i>Ethylene-responsive transcription factor (ERF003)</i></b> | <i>ERF003_F</i><br><i>ERF003_R</i>       | TCAAAGAGCGGGTGGGTGGTCA<br>TGCTGAACACTGTTGTCTCCTTGGCCT | 102                |
| <b><i>Auxin response factors (ARFs) (ARF6)</i></b>              | <i>ARF6_F</i><br><i>ARF6_R</i>           | TGTCGCTGGTTTTCTCCGGCA<br>AGGGAGCCTCACGGTCACCACT       | 139                |
| <b><i>Gretchen hagen 3 (GH3-1)</i></b>                          | <i>GH3_F</i><br><i>GH3_R</i>             | GTTCCGTTTTGTGTCGCTCT<br>ACGATCCTGACCGAAATCAC          | 160                |
| <b><i>1-aminocyclopropane-1-carboxylate oxidase (ACO)</i></b>   | <i>ACO_F</i><br><i>ACO_R</i>             | AACTCCTCAAGGACGGCAAA<br>AATAACCCGGTGCTCCACAC          | 125                |
| <b><i>Fructose-bisphosphate aldolase (FBA)</i></b>              | <i>FBA_F</i><br><i>FBA_R</i>             | CCTTCTCATTCGGGCGGGCG<br>GCCCAGAGTGGCCTCGGAGT          | 128                |
| <b><i>Cellulose Synthase A Catalytic 8 (CSACat8)</i></b>        | <i>CSACat8_F</i><br><i>CSACat8_R</i>     | CCATCTCTTTGCCGTCTTCC<br>TATCAGCAGCGTCGTCCACT          | 136                |
| <b><i>Isoprene Synthase, Chloroplastic-like (ISC-like)</i></b>  | <i>ISC-like_F</i><br><i>ISC-like_R</i>   | AGACGCTGTTTCGCAGATGGGACAT<br>AGCCAGTTCGTTACGCAGTTGT   | 100                |

**Table S4.** Primers designed for the quantification of age-related gene expression.

| Gene name                                                  | Primers                        | Sequences (5' → 3')                             | Amplicon size (pb) |
|------------------------------------------------------------|--------------------------------|-------------------------------------------------|--------------------|
| <i>Gretchen hagen 3 (GH3-1)</i>                            | <i>GH3_F</i><br><i>GH3_R</i>   | GTTCCGTTTTGTGTCGCTCT<br>ACGATCCTGACCGAAATCAC    | 160                |
| <i>Auxin response factor (ARF6)</i>                        | <i>ARF6_F</i><br><i>ARF6_R</i> | TGTCGCTGGTTTTCTCCGGCA<br>AGGGAGCCTCACGGTCACCACT | 139                |
| <i>Arabidopsis response regulator 1 (ARR1)</i>             | <i>ARR1_F</i><br><i>ARR1_R</i> | CCCTCCTGTGATTGGGCTGC<br>ATCCTGTTGCCGTGCTCCAC    | 107                |
| <i>Transport Inhibitor Response 1 (TIR1)</i>               | <i>TIR1_F</i><br><i>TIR1_R</i> | GCATGTAAGCTGCTTGGTCA<br>AAAATCAGGCATGTCGAACC    | 153                |
| <i>Tryptophan aminotransferase in Arabidopsis 1 (TAA1)</i> | <i>TAA1_F</i><br><i>TAA1_R</i> | GGGAACAGGTGACAAACTCAA<br>GGCTTACATGGACCTGAAGA   | 157                |
| <i>Scarecrow-Like 1 (SCL1)</i>                             | <i>SCL1_F</i><br><i>SCL1_R</i> | AGGCGCTCTTCCATTATTCG<br>CCTTCGCAGGCAATTACGTT    | 130                |
| <i>Aintegumenta-Like 1 (AIL1)</i>                          | <i>AIL1_F</i><br><i>AIL1_R</i> | AGGCACTGGCGTTGGTGGTG<br>AGATGGCCGGGTCCCCCAAG    | 142                |
